1 **Living in Endemic Area for Infectious Diseases is Associated to Differences in**  
2 **Immunosenescence Signatures**

3

4 Monique Macedo Coelho<sup>1</sup>; Felipe Caixeta Moreira<sup>1</sup>; Luciana Werneck Zuccherato<sup>1</sup>;  
5 Lucas Haniel de Araújo Ventura<sup>1</sup>; Giovanna Caliman Camatta<sup>1</sup>; Bernardo Starling-  
6 Soares<sup>1</sup>; Lícia Torres<sup>1</sup>; Danielle Fernandes Durso<sup>1</sup>; Hugo Itaru Sato<sup>1</sup>; Murilo Soares da  
7 Costa<sup>2</sup>, Henrique Cerqueira Guimarães<sup>3</sup>, Rafael Calvão Barbuto<sup>3</sup>; Mauro Lúcio O.  
8 Júnior<sup>4</sup>, Elaine Speziali<sup>5,6</sup>, Unai Tupinambas<sup>2</sup>, Santuza Maria Ribeiro Teixeira<sup>1</sup>;  
9 Gabriela Silveira-Nunes<sup>7</sup>; Andrea Teixeira-Carvalho<sup>5</sup>, Tatiani Uceli Maioli<sup>1,8</sup>; Ana  
10 Maria Caetano Faria<sup>1\*</sup>

11 <sup>1</sup> Departamento de Bioquímica e Imunologia, Instituto de Ciências Biológicas,  
12 Universidade Federal de Minas Gerais, Belo Horizonte, Brazil.

13 <sup>2</sup> Departamento de Clínica Médica, Faculdade de Medicina, Universidade Federal de  
14 Minas Gerais, Belo Horizonte, Brazil

15 <sup>3</sup> Hospital Risoleta Tolentino Neves, Belo Horizonte, Brazil.

16 <sup>4</sup> Hospital da UNIMED, Governador Valadares, Brazil

17 <sup>5</sup> Instituto de Pesquisa René Rachou, Fundação Oswaldo Cruz, Belo Horizonte, Brazil

18 <sup>6</sup> Universidade Edson Antônio Velano, Fundação de Ensino e Tecnologia de Alfenas,  
19 Belo Horizonte, Brazil.

20 <sup>7</sup> Departamento de Medicina, Universidade Federal de Juiz de Fora, Governador  
21 Valadares, Brazil.

22 <sup>8</sup> Departamento de Nutrição, Escola de Enfermagem, Universidade Federal de Minas  
23 Gerais, Belo Horizonte, Brazil

24

25 **\* Corresponding Author:** Ana Maria Caetano Faria, Departamento de Bioquímica e  
26 Imunologia, Instituto de Ciências Biológicas, Universidade Federal de Minas Gerais,  
27 Av. Antônio Carlos, 6627, Belo Horizonte, CEP 31270-901, MG, Brazil. E-mail:  
28 [anacaetanofaria@gmail.com](mailto:anacaetanofaria@gmail.com)

29

30 **Abstract:**

31 Research on aged individuals from developed countries show that lifestyle factors such  
32 as diet, physical activity, stress, smoking, and sleep quality impact aging. However,  
33 other relevant factors may influence aging in less-studied populations, such as Brazilian  
34 cohorts. This study aimed to analyze immunosenescence profile of individuals living in  
35 an endemic area for several infectious diseases in Brazil. We showed that these  
36 individuals exhibited accelerated epigenetic aging and increased production of IL-  
37 12p70, IL-17A, and IL-9. Production of inflammatory mediators IL-12p70, IL-6, IL-1 $\beta$ ,  
38 IL-2, and IL-1ra in individuals with flu-like symptoms and those with COVID-19 was  
39 higher among residents in endemic areas than in residents from a control non-endemic  
40 area. Furthermore, residents of the endemic area had a more prominent inflammatory  
41 profile during viral infection and a different pattern of plasma mediators when  
42 compared to residents of a non-endemic area. It suggests that these two cohorts had  
43 specific immune signatures regardless of the presence or the type of infection at study.  
44 Therefore, we demonstrated that there were distinct patterns of immune responses and  
45 epigenetic aging depending on the environment the individuals live in. These  
46 observations add a layer of diversity to the studies of human aging by including less  
47 represented individuals.

48

49 **Keywords:** endemic area; infectious diseases; immunosenescence, environment

50

51

52

53 **Introduction:**

54 Aging is a multifactorial and heterogeneous biological phenomenon that affects  
55 individuals in diverse ways(Cohen et al., 2020). Lifestyle factors, such as nutritional  
56 habits, physical activity, well-being, stress, smoking, and sleep quality, significantly  
57 influence the aging process(Bloomberg et al., 2024; Friedman, 2020).

58 Aging affects all body compartments, and the immune system is one of the most  
59 affected. Changes in immune activity are known as immunosenescence and it includes a  
60 chronic state of low-grade inflammation, termed "inflammaging," characterized by  
61 alterations in the levels of plasma mediators such as IL-6, TNF- $\alpha$ , IL-1, and IL-  
62 10(FRANCESCHI et al., 2000; Fulop et al., 2018). Inflammaging is a systemic  
63 consequence of various aging-related events, including epigenetic changes,  
64 mitochondrial dysfunction, genomic instability, and the emergence of the senescence-  
65 associated secretory phenotype (SASP) by senescent cells(Franceschi et al., 2007).

66 Immunosenescence increases the susceptibility to a range of diseases(Hanlon et al.,  
67 2018; Kennedy et al., 2014). However, the modifications that accompany aging are  
68 often compensatory and protective for living organisms. Grosse and colleagues  
69 demonstrated that senescent cells play important physiological roles, and their  
70 elimination could lead to health deterioration and a shorter lifespan in mice due to the  
71 disruption of blood-tissue barriers(Grosse et al., 2020). Moreover, not all aged  
72 individuals suffer from chronic inflammatory diseases and frailty. Studies on healthy  
73 nonagenarians and centenarians in Italy and in healthy elderly people in Brazil showed  
74 that these individuals develop remodelling mechanisms that control the deleterious  
75 effects of inflammation and immunosenescence(Caetano Faria et al., 2008; Caruso et  
76 al., 2022; Lima-Silva et al., 2024; Santoro et al., 2021).

77 In a previous study, we reported that the response triggered by continuous antigenic  
78 stimuli can lead to accelerated senescence in individuals residing in endemic  
79 areas(Durso et al., 2022). Herein, we examined aging in an endemic area (EA) in Brazil,  
80 where the prevalence of well-characterized infections such as schistosomiasis,  
81 leishmaniasis, and leprosy is high. Immunosenescence has been known as a  
82 consequence of chronic antigenic exposure(De Martinis et al., 2005). However, there is  
83 no detailed evaluation of the immunological repercussions in the immunosenescence

84 profile of individuals residing in EAs compared to those living in non-endemic areas  
85 (NEAs).

86 DNA methylation is one of several mechanisms that regulate gene expression and is  
87 considered an important biomarker of aging. Based on methylation status, epigenetic  
88 clocks have been developed to calculate individuals' biological age. These clocks can  
89 detect not only the acceleration of aging but also the effects of deceleration in models of  
90 healthy aging(Field et al., 2018).

91 Moreover, DNA methylation patterns are associated with a wide range of age-related  
92 diseases, including Alzheimer's(Pellegrini et al., 2021), cardiovascular  
93 diseases(Fernández-Sanlés et al., 2021), and cancer (Durso et al., 2017). Age  
94 acceleration measured by methylation patterns are known to be altered in response to  
95 environmental stimuli such as exercise (Turner et al., 2020), diet (Pauwels et al., 2017),  
96 smoking (Joubert et al., 2016), and pollutants (Plusquin et al., 2017). One study  
97 demonstrated that an eight-week treatment program, including diet, sleep, exercise,  
98 relaxation techniques, and probiotic supplementation, was able to reduce the epigenetic  
99 age of a group of 43 adult men by 3.23 years (Fitzgerald et al., 2021).

100 Traditionally aging studies focuses on cohorts and issues associated with developed  
101 countries and Caucasian populations. Our hypothesis in this study is that, in addition to  
102 lifestyle, other significant environmental factors such as chronic exposure to infectious  
103 agents may be associated with distinct patterns of immunosenescence and aging.  
104 Therefore, in this study, we aim to evaluate the immunological repercussions in  
105 individuals residing in a cohort of individuals from an endemic area in Brazil.

## 106 **Material and methods**

### 107 **Ethics statement**

108 This study meticulously adhered to the ethical standards set forth by National Research  
109 Ethics Committee (CONEP), prioritizing the safety and well-being of all participants. It  
110 was approved by Human Research Ethical Board of UFMG (CEP-UFMG) and the  
111 National Research Ethics Committee (CONEP) (CAAE # 40208320.3.1001.5149). All  
112 volunteers were informed of the objectives and procedures involved in the study and  
113 they signed the Informed Consent Form (TCLE) before their voluntary participation.

### 114 **Study subjects**

115 The research was conducted in two distinct Brazilian cities: one living in a non-endemic  
116 area for infectious diseases (Belo Horizonte/MG), where 107 participants were enlisted,  
117 and another in an endemic region (Governador Valadares/MG), also with 107  
118 participants. This amassed a cohort of 214 individuals, whose attributes are elaborated  
119 upon in Table 1.

120 Volunteer recruitment spanned from December 2020 to October 2021, focusing on  
121 identifying individuals displaying symptoms akin to flu-like syndromes of unknown  
122 origin (Flu-like syndrome) and COVID-19, alongside including individuals in good  
123 health (control group). Throughout the collection period, circulating strains of COVID-  
124 19 encompassed both the original variant and P1. All chosen volunteers underwent an  
125 RT-PCR (Real-Time Polymerase Chain Reaction) test to validate the diagnosis of  
126 COVID-19. Volunteers were recruited at UPA-Centro Sul and Hospital Universitário  
127 Risoleta Tolentino Neves in Belo Horizonte and Hospital Unimed in Governador  
128 Valadares.

129 The study's inclusion criteria involved recruiting adult or elderly volunteers aged 20  
130 years old or above, irrespective of whether they exhibited flu-like symptoms, provided  
131 they consented to sign the Informed Consent Form (TCLE). The participant selection  
132 process also adhered to specific exclusion criteria, excluding children and adolescents  
133 (under 18 years old), individuals with inconclusive results in the RT-PCR test for  
134 COVID-19 detection, flu-like symptoms persisting beyond 9 days, and individuals  
135 living with HIV.

136 The body mass index (BMI) of the participants was categorized based on the following  
137 criteria: less than 18.5 (underweight), between 18.5 and 24.9 (normal weight), between  
138 25.0 and 29.9 (overweight), and exceeding 30.0 (obesity).

139 The volunteers were engaged by the study team in health units where they reviewed and  
140 addressed any queries regarding the Informed Consent Form (ICF), they underwent a  
141 clinical and sociodemographic questionnaire session and had their blood samples  
142 collected for serum and plasma separation, alongside swab collection for SARS-CoV-2  
143 detection via RT-PCR. Individuals diagnosed with COVID-19 were telemonitored for  
144 14 days following confirmation and delivery of the RT-PCR test results.

145

146  
147  
148  
149  
150  
151  
152

**Table 1 – Characterization of the study sample:**

|                          | AE (endemic area)   |                    |                               | NEA (non-endemic area) |                    |                               |
|--------------------------|---------------------|--------------------|-------------------------------|------------------------|--------------------|-------------------------------|
|                          | Flu- Like<br>n = 45 | COVID-19<br>n = 47 | Negative<br>Control<br>n = 15 | Flu- Like<br>n = 45    | COVID-19<br>n = 47 | Negative<br>Control<br>n = 15 |
| Age (years)              | 38 (18-60)          | 38,5 (18-77)       | 41 (19-78)                    | 36 (19-63)             | 40,5 (18-76)       | 39 (18-65)                    |
| Sex Female (%)           | 51,1                | 46,8               | 46,7                          | 46,6                   | 53,19              | 53,3                          |
| Sex Male (%)             | 48,9                | 54,2               | 53,3                          | 53,4                   | 46,80              | 46,6                          |
| BMI (Kg/m <sup>2</sup> ) | 28,3 ±5,57          | 26,29 ±4,53        | 26 ±4,21                      | 28,4 ±7                | 30 ±5,67           | 27 ±6,82                      |
| Viral Load (ct)          | –                   | 21,89 ±7,12        | –                             | –                      | 27,3 ±5,14         | –                             |
| Comorbidity (%)          | 28,8                | 23,4               | 20                            | 24,4                   | 23,4               | 26,6                          |
| Hipertension (n)         | 9                   | 6                  | 2                             | 6                      | 6                  | 3                             |
| Diabetes Miellitus (n)   | 3                   | 3                  | 0                             | 4                      | 3                  | 1                             |
| Respiratory Disease (n)  | 0                   | 2                  | 1                             | 1                      | 0                  | 0                             |
| Others (n)               | 1                   | 0                  | 0                             | 0                      | 2                  | 0                             |

153  
154  
155  
156

NEA- non-endemic area; EA- endemic area; NC- negative control; FS- flu syndrome; BMI – body mass index calculated by the formula kg/m<sup>2</sup> where kg is a person's weight in kilograms and m<sup>2</sup> is their height in squared meters.

157

### 158 **Luminex-Multiplex measurement of inflammatory mediators**

159 To assess blood mediators, we utilized heparinized plasma from our volunteers,  
160 employing the Bio-Plex® Pro Human Cytokine Standard multiplex kit by Bio-Rad  
161 Laboratories. This kit facilitates the simultaneous analysis of numerous analytes through  
162 magnetic immunoassay, conducted on Luminex equipment (Bio-Plex® 200, Bio-Rad).  
163 The quantified panel of analytes encompasses IL-1 $\beta$ , IL-1Ra, IL-2, IL-4, IL-5, IL-6, IL-  
164 7, CXCL8, IL-9, IL-10, IL-12p70, IL-13, IL-15, IL-17A, CCL11, FGF-Basic, G-CSF,  
165 GM-CSF, IFN- $\gamma$ , CXCL10, CCL2, CCL3, CCL4, PDGF-BB, CCL5, TNF- $\alpha$ , and VEGF  
166 (Table 4). The analyses were conducted utilizing the Bioplex™ xPONENT software  
167 version 3.1 by Bio-Rad.

### 168 **Radar plots**

169 The radar chart depicted cytokines/chemokines categorized as low ( $\leq$  global median)  
170 and high ( $\geq$  global median) producers, utilizing the global median of each mediator as a  
171 cut-off (Silveira-Nunes et al., 2017). The calculation of the global median encompassed  
172 the entire dataset derived from the respective groups. Within the radar, each axis  
173 symbolizes individuals exhibiting elevated levels of a specific mediator (termed high  
174 producers). These axes interconnect to form a polygonal area, illustrating the  
175 equilibrium between growth factors, inflammatory, and anti-inflammatory mediators.  
176 An increase or decrease in this area signifies a higher or lower contribution of each  
177 mediator to the overall profile.

### 178 **DNA extraction and bisulphite treatment**

179 Genomic DNA extraction was conducted from peripheral whole blood samples using  
180 the Trizol and Chloroform protocol. Subsequently, 1  $\mu$ g of DNA underwent bisulfite  
181 conversion utilizing the EZ-96 DNA Methylation Kit (Zymo Research, Irvine, USA)  
182 with specific adjustments: incubation in CT buffer for 21 cycles of 15 minutes at 55°C  
183 and 30 seconds at 95°C, followed by elution of the bisulfite-treated DNA in 100  $\mu$ l of  
184 water. Post-extraction and conversion, the samples were loaded onto the Illumina  
185 Infinium Methylation EPIC Bead Chip. Fluorescence data were collected from all  
186 enrolled subjects, and subsequent beta values were calculated.

### 187 **Estimation of DNAm age**

188 Following the acquisition of the methylation beta value matrices file, we utilized the  
189 methylclock 1.5.0 package (Pelegi-Siso et al., 2021) to estimate biological ages and  
190 aging acceleration through nine distinct methylation clocks.

### 191 **Serology**

192 Serological analysis was carried out on individuals from EA (Governador Valadares,  
193 Brazil) to detect IgG antibodies against the dengue virus, cytomegalovirus (CMV), and  
194 the anti-K39 leishmaniasis antigen. All examinations were outsourced to the Hermes  
195 Pardini Laboratory in Belo Horizonte, Brazil, adhering to the institution's protocols for  
196 detection techniques, sample transportation, and storage methods. Dengue serology  
197 employed Enzyme Immunoassay, facilitating the quantitative detection of specific IgG  
198 for all dengue serotypes (DEN1, 2, 3, and 4). CMV testing utilized the ELFA  
199 (Fluorimetry Enzyme Assay) technique, allowing the quantitative detection of IgG  
200 antibodies specific to CMV types 1 and 2 antigens. Lastly, leishmaniasis serology was  
201 performed using Immunochromatography, enabling the detection of the K-39 antigen,  
202 widely utilized in confirming suspected cases of Visceral Leishmaniasis and chronic  
203 instances of the disease.

### 204 **Spearman's correlation analysis**

205 Spearman's coefficient analysis was performed using the R package to assess multiple  
206 associations between biomarkers and determine the strength of relationships. The  
207 correlation coefficient value ranges from -1 to +1, where a positive value indicates  
208 changes in the same direction and a negative value indicates opposite directions. A value  
209 of 0 signifies no association between variables. The correlation plot displays only those  
210 correlations with  $p < 0.05$ . Circle size represents statistical significance, with larger  
211 circles denoting lower p-values and increased significance.

### 212 **Statistical analysis**

213 The significance of differences between groups was assessed through parametric tests  
214 (Student's t-test and analysis of variance – ANOVA, followed by Tukey's post-test) or  
215 non-parametric tests (Mann-Whitney U and Kruskal-Wallis test, followed by Dunn's  
216 post-test). The normality of sample distribution was assessed using the Kolmogorov-  
217 Smirnov test. Participant characteristics were presented as mean (standard deviation) or  
218 median (minimum to maximum range) for continuous variables and as frequency



219 (number) for categorical variables. When appropriate, means (standard deviation) or  
220 medians (interquartile range) were depicted in graphs. All statistical analyses were  
221 conducted using the GraphPad Prism 8.0 package, considering a difference as  
222 significant when  $p < 0.05$ .

223

## 224 **Results:**

### 225 **Individuals Residing in Endemic Areas had Accelerated Epigenetic Aging**

226 A previous report conducted by our group described that individuals living in an area  
227 endemic for infectious diseases had accelerated biological age measured by DNA  
228 methylation(Durso et al., 2022). This study included volunteers from Governador  
229 Valadares, MG, an endemic area (EA), and individuals from São Paulo, SP, a non-  
230 endemic area (NEA). In this study, we also compared the epigenetic aging of the  
231 volunteers from another city, Belo Horizonte, MG, as a NEA sample. Epigenetic  
232 analyses indicated that individuals living in EA also exhibited accelerated aging  
233 compared to those living in NEAs across the six biological clocks evaluated:  
234 skinHovarth (Fig. 1a), PedBE (Fig. 1b), Wu (Fig. 1c), TL (Fig. 1d), BLUP (Fig. 1e), and  
235 EN (Fig. 1f).

236

### 237 **Individuals Residing in Endemic Areas for Infectious Diseases Presented Higher** 238 **Production of IL-12p70, IL-17A, and IL-9**

239 Since aging can lead to various alterations in the immune response (Franceschi et al.,  
240 2007), we investigated the immune repercussions in the production of inflammatory  
241 mediators in our cohort. Residents in EA had higher production of IL-12p70 (Fig. 2a),  
242 IL-17A (Fig. 2b), and IL-9 (Fig. 2c) compared to individuals living in NEA. Of note,  
243 these individuals were reactive to other viral infections, such as dengue and CMV (see  
244 Table 2). On the other hand, residents in NEA showed higher production of IL-6 (Fig.  
245 2d), IL-1 $\beta$  (Fig. 2e), IL-2 (Fig. 2f), IL-1ra (Fig. 2g), and IL-10 (Fig. 2h). Additionally,  
246 individuals residing in EA presented a less homogeneous profile and a higher frequency  
247 of high producers of PDGF-BB, VEGF, CXCL11, IL-9, IL-12p70, and IL-17A  
248 compared to NEA residents (Fig. 2i, j).

249

250 **Table 2. Prevalence of CMV, Dengue, and Leishmania infections among negative**  
251 **control (NC) individuals residing in the EA based on serological analysis:**

| <b>Negative control individuals residing in EA (n=15)</b> |      |
|-----------------------------------------------------------|------|
| CMV                                                       | 100% |
| Dengue                                                    | 100% |
| Leishmania                                                | 0%   |

252

253

254 **Individuals from endemic area with either Flu-Like Symptoms or COVID-19 had**  
255 **Higher Production of plasma mediators.**

256 Alterations in immune activity associated with aging can increase vulnerability to  
257 infectious diseases (Bernabeu-Wittel et al., 2020). In this study, we explored putative  
258 differences in the production of inflammatory mediators in response to viral infections  
259 between the two cohorts. Participants from endemic areas for infectious diseases (EA)  
260 were compared to those from non-endemic areas (NEA) who exhibited either flu-like  
261 symptoms or COVID-19. Individuals with either flu-like symptoms or infected with  
262 COVID-19 residing in EA exhibited higher production of IL-12p70 (Fig. 3a), IL-6 (Fig.  
263 3b), IL-1 $\beta$  (Fig. 3c), IL-2 (Fig. 3d), and IL-1ra (Fig. 3e) compared to NEA residents.  
264 Additionally, EA individuals with COVID-19 showed increased production of IL-10  
265 compared to NEA individuals (Fig. 3f).

266

267 **High Producer Profile of Individuals Residing in Endemic Areas versus Non-**  
268 **Endemic Areas**

269 In addition to the differences found in cytokine production, we observed that these  
270 individuals exhibited a higher frequency of high producers of inflammatory mediators,  
271 anti-inflammatory mediators, chemokines, and growth factors compared to NEA  
272 residents, both with flu-like syndromes (Fig. 4a, b) and COVID-19 (Fig. 4c, d).  
273 Furthermore, the inflammatory profile of individuals residing in EA is very similar to  
274 the profile of individuals residing in NEA regardless of the type of infection, (Fig. 4c,  
275 d).

276

277 **Individuals Residing in Endemic Area had Distinct Correlations Among**  
278 **Inflammatory Mediators and Epigenetic Age**

279 Aging is accompanied by a state of low-grade chronic inflammation, known as  
280 "inflammaging"(FRANCESCHI et al., 2000). Since individuals residing in EA exhibit  
281 accelerated aging and possess a distinct profile in the production of inflammatory  
282 mediators compared to NEA residents, we aimed to understand the biomarkers  
283 associated with the biological aging of these individuals by comparing correlation  
284 matrices. The correlogram of individuals living in EA showed more intense positive  
285 correlations among inflammatory mediators than the correlogram of individuals living  
286 in NEA (Fig. 5 a, b). Furthermore, epigenetic age is positively correlated, in increasing  
287 order, with CXCL8, CCL5, CCL4, IL-5, CCL3, TNF $\alpha$ , IL-17A, CXCL11, IL-9, IL-6,  
288 bFGF, CXCL10, G-CSF, IL-7, CCL2, IL-4, VEGF, and GM-CSF in EA volunteers,  
289 while in NEA volunteers, epigenetic age is positively correlated, in increasing order,  
290 with IL17A, CCL2, IL-4, IL-10, CXCL11, IL-12p70, IL-7, CCL5, and IL-9 (Fig. 5 d).

291

292 **Discussion:**

293 Environmental factors, such as lifestyle, can play a crucial role in promoting healthy  
294 aging. While chronological aging progresses at a fixed rate, the rate of biological aging  
295 varies among individuals. Biological age can be measured by epigenetic clocks, which  
296 are based on DNA methylation patterns (Field et al., 2018).

297 To understand whether frequent exposure to infectious antigens leads to accelerated  
298 aging, we used six epigenetic clocks to compare the aging of individuals residing in an  
299 EA with those in a NEA. Our results showed that individuals in the EA exhibit  
300 accelerated epigenetic aging across all evaluated methylation clocks (Fig. 1a-f). These  
301 findings are consistent with results from a previously published study by our group,  
302 despite using a cohort from a different NEA(Durso et al., 2022).

303 Among the various modifications associated with aging, numerous changes in immune  
304 activity are observed. One of the most prominent is the "inflammaging", a chronic low-  
305 grade inflammation present in the elderly, characterized by the production of IL-1, IL-6,  
306 and TNF- $\alpha$ (FRANCESCHI et al., 2000). In this study, differently from the previous one,  
307 we examined the production of inflammatory mediators in our two cohorts of

308 individuals and found that residents in EA had increased production of IL-12p70 (Fig.  
309 2a), IL-17A (Fig. 2b), and IL-9 (Fig. 2c). In contrast, individuals residing in the NEA  
310 showed higher production of IL-6 (Fig. 2d), IL-1 $\beta$  (Fig. 2e), IL-1ra (Fig. 2f), IL-2 (Fig.  
311 2g), and IL-10 (Fig. 2h).

312 Although our results indicate higher production of IL-6 (Fig. 2d) and IL-1 $\beta$  (Fig. 2e) in  
313 NEA residents—cytokines typically associated with *inflammaging*, a phenomenon  
314 commonly linked to elderly populations—it is important to note that the volunteers in  
315 both groups were age-matched. Furthermore, this study does not focus on a cohort of  
316 elderly individuals but rather on two cohorts with distinct biological aging profiles. It is  
317 worth emphasizing that aging is a continuous process that occurs throughout life,  
318 beginning at birth.

319 IL-12 consists of the p35 and p40 subunits, which combine to form the bioactive IL-  
320 12p70. This cytokine is crucial for IFN- $\gamma$  production and the activation of Th1 cells(Gee  
321 et al., 2009). IL-17A, on the other hand, is primarily produced by Th17 cells in response  
322 to IL-1 $\beta$  and IL-23, mediating immunity against fungi and bacteria(Mills, 2023). IL-9 is  
323 a pleiotropic cytokine produced by Th2 cells, ILC2s, mast cells, and basophils, playing  
324 a significant role in type 2 immunity, autoimmunity, and the immune response to  
325 tumors(Pajulas et al., 2023). IL-6 is an acute-phase pro-inflammatory cytokine secreted  
326 primarily by macrophages, important for regulating inflammatory disorders such as  
327 viral infections(Aliyu et al., 2022; Gubernatorova et al., 2020). IL-1 $\beta$ , also produced by  
328 macrophages, is cleaved by inflammasome activation, which is triggered by caspase-1.  
329 Besides protecting against pathogens, this cytokine regulates sterile insults and plays a  
330 crucial role in proliferation, differentiation, and apoptosis (Bent et al., 2018).  
331 Conversely, IL-1ra acts as a natural inhibitor of IL- $\beta$  by serving as an antagonist of the  
332 interleukin-1 receptor(Yazdi and Ghoreschi, 2016). Increased production of IL-1ra is a  
333 regulatory response to control the elevated secretion of IL-1 $\beta$ . IL-10 exerting potent  
334 immunosuppressive functions(Wang et al., 2019). On the other hand, IL-2 can have  
335 opposing functions playing a significant role in both inflammation and suppression. It is  
336 involved in the proliferation of T cells, facilitating the generation of effector and  
337 memory cells, and in the maintenance of regulatory T cells(Abbas et al., 2018).

338 In response to immunogenic challenges, the immune response typically polarizes  
339 towards Th1, Th2, or Th17 pathways. Interestingly, our data revealed a lack of

340 polarization in the profile of mediators from individuals residing in EA with  
341 inflammatory cytokines exerting diverse functions. In contrast, the panel of mediators  
342 produced by individuals in NEA was more balanced, with elevated production of both  
343 early inflammatory cytokines and anti-inflammatory cytokines. This suggests that at  
344 steady state individuals residing in endemic areas had an immunological plasma profile  
345 very distinct from the one exhibited by individuals from non-endemic areas.

346 Inflammation is a natural process that plays a crucial role in various functions, including  
347 embryogenesis and tissue repair (Ramos, 2012). A balanced profile of immune response  
348 is considered a marker of health since chronic inflammation is detrimental and can  
349 contribute to biological aging, as observed in studies of individuals with HIV (Giron et  
350 al., 2024), autoimmune diseases such as systemic lupus erythematosus (Mazzone et al.,  
351 2019), and conditions like obesity or type 2 diabetes (Ling and Rönn, 2019). Despite the  
352 differences observed in the production of inflammatory mediators between the groups,  
353 the levels remained subclinical, and no symptom was reported. Moreover, participants  
354 in both groups do not exhibit significant comorbidities or differences in age or sex  
355 (Table 1). However, all individuals residing in EA tested positive for viral infections,  
356 such as dengue and CMV, in serological tests (Table 2). It is likely that these infections  
357 impacted in the inflammatory profile of individuals from EA (Pawelec, 2014).

358 It is known that changes in immune activity associated with aging can increase  
359 vulnerability to diseases (Bernabeu-Wittel et al., 2020; Chung et al., 2018). Therefore,  
360 we also investigated whether individuals residing in endemic areas exhibited differences  
361 in the production of inflammatory mediators in response to viral infections. We  
362 compared residents of EA with those in NEA who had flu-like symptoms or were  
363 diagnosed with mild COVID-19 according to the World Health Organization (WHO,  
364 2020) classification criteria.

365 Residents of EA with COVID-19 and FLS had higher production of IL-12p70, IL-6, IL-  
366 1 $\beta$ , IL-2, and IL-1ra compared to residents of NEA (Fig. 3a-e), as well as an increased  
367 production of IL-10 in COVID-19 patients (Fig. 3f). Additionally, these individuals  
368 showed a greater frequency of high producers of cytokines, chemokines, and growth  
369 factors, compared to those in NEA, both among those with flu-like symptoms (Fig. 2a,  
370 b) and those with COVID-19 (Fig. 2c, d).

371 Therefore, individuals residing in EA not only responded more intensely to infections  
372 than those in NEA, but they also produced a distinctive panel of mediators during these  
373 responses. We hypothesize that this may be due to a combination of an  
374 immunosenescent inflammatory profile, characteristic of those exposed to multiple  
375 infections throughout life (Fig. 2), and their response to the viral antigens they  
376 encountered at the time of the study. A previous report supports this hypothesis, as it  
377 demonstrated that even young adults co-infected with cytomegalovirus and Epstein-Barr  
378 virus already had an aging-related T cell phenotype (Hofstee et al., 2023).

379 Additionally, our results showed that although individuals with COVID-19 residing in  
380 EA produced higher levels of mediators compared to those with flu-like symptoms (Fig.  
381 4c, d), the inflammatory profile of EA residents was very similar regardless of the type  
382 of infection (Fig. 4b, d). The same was true for residents in NEA (Fig. 4a, c).

383 These results lead us to believe that environmental differences, triggered by local  
384 stressors, were associated not only with varying rates of biological aging but also with  
385 distinct immunological profiles at steady state and during viral infectious diseases.

386 To understand whether there are differences in aging-associated inflammatory mediators  
387 between individuals from EA and those from NEA, we correlated three epigenetic  
388 clocks with the production of inflammatory mediators. The correlation matrix for  
389 individuals living in EA showed a greater number of positive correlations and stronger  
390 correlations among inflammatory mediators compared to the correlogram for  
391 individuals in NEA (Fig. 5a, b).

392 Additionally, epigenetic age was positively correlated, in descending order, with  
393 CXCL8, CCL5, CCL4, IL-5, CCL3, TNF- $\alpha$ , IL-17A, CXCL11, IL-9, IL-6, bFGF,  
394 CXCL10, G-CSF, IL-7, CCL2, IL-4, VEGF, and GM-CSF among EA volunteers (Fig.  
395 5d). In contrast, for NEA volunteers, epigenetic age was positively correlated, in  
396 descending order, with IL-17A, CCL2, IL-4, IL-10, CXCL11, IL-12p70, IL-7, CCL5,  
397 and IL-9 (Fig. 5c).

398 It has been proposed that aging is not characterized solely by deleterious changes and  
399 functional decline, but it includes a remodeling process to cope with challenges that  
400 occurs throughout life (Raffington, 2024). In this sense, aging involves compensatory  
401 changes resulting from the immunological history of individuals. Our data on the

402 immunological and biological age of individuals who are residents of EA and NEA  
403 confirm this hypothesis.

404 Several studies indicate that aging can be accelerated by various lifestyle factors, such  
405 as processed foods and poor sleep quality(Friedman, 2020). In this study, we added a  
406 layer of complexity to these findings demonstrating that living in endemic areas for  
407 infectious disease may also impact on the immunological profile of individuals and in  
408 their aging process. Continuous exposure to strong antigenic stimulation is probably  
409 determinant for these differences, and they may be an important factor for the aging  
410 process of populations from many regions of the world, not only Brazil. Therefore,  
411 these data are relevant for a more universal understanding of immunosenescence and for  
412 the design of strategies to promote healthy aging.

413

414 **Conflict of interest:** Authors report no conflict of interest.

415

416 **Author contributions:** AMC designed the study, coordinate the recruitment and all the  
417 analysis of the project, wrote the manuscript; M.M.C. designed the work, performed  
418 most of analysis and wrote the manuscript; F.C.M. performed the bioinformatic analysis  
419 and discussed the results; L.W.Z. helped with the DNA methylation analysis and the  
420 discussion of the results; L.T. and L.H.A.V. performed the Luminex analysis and helped  
421 with discussion of the results; L.H.A.V. and G.C.C. performed the recruitment and  
422 blood collection of the volunteers; B.S-S. helped with the DNA methylation analysis  
423 and the discussion of the results; D.F.D. helped with the analysis of DNA methylation  
424 data; H.I.S. performed the RT-PCR tests of all volunteers under the supervision of  
425 S.M.R.T.; M.S.C. performed the clinical exams of volunteers at UPA-Centro Sul in Belo  
426 Horizonte under the supervision of U.T.; H.C.G. and R.C.B. were in charge of clinical  
427 exams of volunteers recruited at Hospital Universitário Risoleta Tolentino Neves in  
428 Belo Horizonte; M.L.O.J. was in the charge of the clinical exams of volunteers recruited  
429 at Hospital Unimed in Governador Valadares; E.S.F. helped with the Luminex analysis  
430 and analysis of the data; G.S-N. coordinate all the recruitment and sample collection of  
431 volunteers from Governador Valadares and helped with the statistical analysis; A.T-C.  
432 supervised the Luminex analysis, serology tests and helped with the discussion of the  
433 data; T.U.M. coordinate the recruitment, questionnaire application and telemonitoring of  
434 volunteers of Belo Horizonte.



435

436 **Funding:** This study was supported by grants from Merck Dohem & Sharp  
437 (MISP#60383), Conselho Nacional de Desenvolvimento Científico e Tecnológico  
438 (CNPq, Brazil, # 407363/2021-1), Coordenação de Aperfeiçoamento de Pessoal do  
439 Ensino Superior (# 0688/2020, CAPES, Brazil). M.M.C., T.U.C., A.M.C.F., G.C.C.,  
440 S.M.R. are recipients of research fellowships and scholarships from CNPq and L.T. are  
441 recipients of scholarships and fellowships from CAPES, Brazil, F.C.M. is recipient of a  
442 scholarship from Fundação de Amparo à Pesquisa do Estado de Minas Gerais  
443 (FAPEMIG, Brazil).

444

445 **Ethical approval:** The study complied with ethical guidelines established by CONEP,  
446 ensuring participant safety and well-being. It received approval from the Human  
447 Research Ethical Board of UFMG and CONEP (CAAE #40208320.3.1001.5149).  
448 Participants were fully informed about the study's objectives and procedures and  
449 provided written consent before participating.

450 **Additional information:** Correspondence and requests for materials should be  
451 addressed to A.M.C.

452 **Data availability:** No datasets were generated or analysed during the current study.

453 **Acknowledgements:** Not applicable.

454

#### 455 **References:**

- 456 Abbas, A.K., Trotta, E., R. Simeonov, D., Marson, A., Bluestone, J.A., 2018. Revisiting  
457 IL-2: Biology and therapeutic prospects. *Sci Immunol* 3, 1482.  
458 <https://doi.org/10.1126/sciimmunol.aat1482>
- 459 Aliyu, M., Zohora, F.T., Anka, A.U., Ali, K., Maleknia, S., Saffarioun, M., Azizi, G.,  
460 2022. Interleukin-6 cytokine: An overview of the immune regulation, immune  
461 dysregulation, and therapeutic approach. *Int Immunopharmacol* 111, 109130.  
462 <https://doi.org/10.1016/j.intimp.2022.109130>
- 463 Bent, R., Moll, L., Grabbe, S., Bros, M., 2018. Interleukin-1 beta—A friend or foe in  
464 malignancies? *Int J Mol Sci.* <https://doi.org/10.3390/ijms19082155>



- 465 Bernabeu-Wittel, M., Ternero-Vega, J.E., Díaz-Jiménez, P., Conde-Guzmán, C., Nieto-  
466 Martín, M.D., Moreno-Gaviño, L., Delgado-Cuesta, J., Rincón-Gómez, M.,  
467 Giménez-Miranda, L., Navarro-Amuedo, M.D., Muñoz-García, M.M., Calzón-  
468 Fernández, S., Ollero-Baturone, M., 2020. Death risk stratification in elderly  
469 patients with covid-19. A comparative cohort study in nursing homes outbreaks.  
470 *Arch Gerontol Geriatr* 91, 104240. <https://doi.org/10.1016/j.archger.2020.104240>
- 471 Bloomberg, M., Muniz-Terrera, G., Brocklebank, L., Steptoe, A., 2024. Healthy lifestyle  
472 and cognitive decline in middle-aged and older adults residing in 14 European  
473 countries. *Nat Commun* 15, 5003. <https://doi.org/10.1038/s41467-024-49262-5>
- 474 Caetano Faria, A.M., Monteiro de Moraes, S., Ferreira de Freitas, L.H., Speziali, E.,  
475 Figueiredo Soares, T., Pretti Figueiredo-Neves, S., Vitelli-Avelar, D.M., Martins,  
476 M.Â., Bastos Dias Barbosa, K.V., Basseti Soares, E., Sathler-Avelar, R., Peruhype-  
477 Magalhães, V., Cardoso, G.M., Comin, F., Teixeira, R., Elói-Santos, S.M.,  
478 Magalhães Queiroz, D.M., Corrêa-Oliveira, R., Bauer, M.E., Teixeira-Carvalho, A.,  
479 Martins-Filho, O.A., 2008. Variation Rhythms of Lymphocyte Subsets during  
480 Healthy Aging. *Neuroimmunomodulation* 15, 365–379.  
481 <https://doi.org/10.1159/000156478>
- 482 Caruso, C., Accardi, G., Aiello, A., Calabrò, A., Ligotti, M.E., Candore, G., 2022.  
483 Lessons from Sicilian centenarians for anti-ageing medicine. The Oxi-  
484 inflammatory status. *Transl Med UniSa* 24, 16–23. [https://doi.org/10.37825/2239-](https://doi.org/10.37825/2239-9747.1036)  
485 [9747.1036](https://doi.org/10.37825/2239-9747.1036)
- 486 Chung, J.-Y., Hsu, C.-C., Chen, J.-H., Chen, W.-L., Lin, H.-J., Guo, H.-R., Huang, C.-  
487 C., 2018. Geriatric influenza death (GID) score: a new tool for predicting mortality  
488 in older people with influenza in the emergency department. *Sci Rep* 8, 9312.  
489 <https://doi.org/10.1038/s41598-018-27694-6>
- 490 Cohen, A.A., Legault, V., Fülöp, T., 2020. What if there’s no such thing as “aging”?  
491 *Mech Ageing Dev* 192, 111344. <https://doi.org/10.1016/j.mad.2020.111344>
- 492 De Martinis, M., Franceschi, C., Monti, D., Ginaldi, L., 2005. Inflammation and  
493 lifelong antigenic load as major determinants of ageing rate and longevity. *FEBS*  
494 *Lett* 579, 2035–2039. <https://doi.org/10.1016/j.febslet.2005.02.055>

- 495 Durso, D.F., Bacalini, M.G., do Valle, Í.F., Pirazzini, C., Bonafé, M., Castellani, G.,  
496 Faria, A.M.C., Franceschi, C., Garagnani, P., Nardini, C., 2017. Aberrant  
497 methylation patterns in colorectal cancer: a meta-analysis. *Oncotarget* 8, 12820–  
498 12830. <https://doi.org/10.18632/oncotarget.14590>
- 499 Durso, D.F., Silveira-Nunes, G., Coelho, M.M., Camatta, G.C., Ventura, L.H.,  
500 Nascimento, L.S., Caixeta, F., Cunha, E.H.M., Castelo-Branco, A., Fonseca, D.M.,  
501 Maioli, T.U., Teixeira-Carvalho, A., Sala, C., Bacalini, M.J., Garagnani, P.,  
502 Nardini, C., Franceschi, C., Faria, A.M.C., 2022. Living in endemic area for  
503 infectious diseases accelerates epigenetic age. *Mech Ageing Dev* 207, 111713.  
504 <https://doi.org/10.1016/j.mad.2022.111713>
- 505 Fernández-Sanlés, A., Sayols-Baixeras, S., Subirana, I., Sentí, M., Pérez-Fernández, S.,  
506 de Castro Moura, M., Esteller, M., Marrugat, J., Elosua, R., 2021. DNA  
507 methylation biomarkers of myocardial infarction and cardiovascular disease. *Clin*  
508 *Epigenetics* 13, 86. <https://doi.org/10.1186/s13148-021-01078-6>
- 509 Field, A.E., Robertson, N.A., Wang, T., Havas, A., Ideker, T., Adams, P.D., 2018. DNA  
510 Methylation Clocks in Aging: Categories, Causes, and Consequences. *Mol Cell* 71,  
511 882–895. <https://doi.org/10.1016/j.molcel.2018.08.008>
- 512 Fitzgerald, K.N., Hodges, R., Hanes, D., Stack, E., Cheishvili, D., Szyf, M., Henkel, J.,  
513 Twedt, M.W., Giannopoulou, D., Herdell, J., Logan, S., Bradley, R., 2021.  
514 Potential reversal of epigenetic age using a diet and lifestyle intervention: a pilot  
515 randomized clinical trial. *Aging* 13, 9419–9432.  
516 <https://doi.org/10.18632/aging.202913>
- 517 FRANCESCHI, C., BONAFÈ, M., VALENSIN, S., OLIVIERI, F., DE LUCA, M.,  
518 OTTAVIANI, E., DE BENEDICTIS, G., 2000. Inflammation and aging: An Evolutionary  
519 Perspective on Immunosenescence. *Ann N Y Acad Sci* 908, 244–254.  
520 <https://doi.org/10.1111/j.1749-6632.2000.tb06651.x>
- 521 Franceschi, C., Capri, M., Monti, D., Giunta, S., Olivieri, F., Sevini, F., Panourgia, M.P.,  
522 Invidia, L., Celani, L., Scurti, M., Cevenini, E., Castellani, G.C., Salvioli, S., 2007.  
523 Inflammaging and anti-inflammaging: A systemic perspective on aging and  
524 longevity emerged from studies in humans. *Mech Ageing Dev* 128, 92–105.  
525 <https://doi.org/10.1016/j.mad.2006.11.016>

- 526 Friedman, S.M., 2020. Lifestyle (Medicine) and Healthy Aging. *Clin Geriatr Med* 36,  
527 645–653. <https://doi.org/10.1016/j.cger.2020.06.007>
- 528 Fulop, T., Larbi, A., Dupuis, G., Le Page, A., Frost, E.H., Cohen, A.A., Witkowski,  
529 J.M., Franceschi, C., 2018. Immunosenescence and Inflamm-Aging As Two Sides  
530 of the Same Coin: Friends or Foes? *Front Immunol* 8.  
531 <https://doi.org/10.3389/fimmu.2017.01960>
- 532 Gee, K., Guzzo, C., Che Mat, N., Ma, W., Kumar, A., 2009. The IL-12 Family of  
533 Cytokines in Infection, Inflammation and Autoimmune Disorders. *Inflammation &*  
534 *Allergy-Drug Targets* 8, 40–52. <https://doi.org/10.2174/187152809787582507>
- 535 Giron, L.B., Liu, Q., Adeniji, O.S., Yin, X., Kannan, T., Ding, J., Lu, D.Y., Langan, S.,  
536 Zhang, J., Azevedo, J.L.L.C., Li, S.H., Shalygin, S., Azadi, P., Hanna, D.B.,  
537 Ofotokun, I., Lazar, J., Fischl, M.A., Haberen, S., Macatangay, B., Adimora, A.A.,  
538 Jamieson, B.D., Rinaldo, C., Merenstein, D., Roan, N.R., Kutsch, O., Gange, S.,  
539 Wolinsky, S.M., Witt, M.D., Post, W.S., Kossenkov, A., Landay, A.L., Frank, I.,  
540 Tien, P.C., Gross, R., Brown, T.T., Abdel-Mohsen, M., 2024. Immunoglobulin G  
541 N-glycan markers of accelerated biological aging during chronic HIV infection.  
542 *Nat Commun* 15, 3035. <https://doi.org/10.1038/s41467-024-47279-4>
- 543 Grosse, L., Wagner, N., Emelyanov, A., Molina, C., Lacas-Gervais, S., Wagner, K.-D.,  
544 Bulavin, D. V., 2020. Defined p16<sup>High</sup> Senescent Cell Types Are Indispensable for  
545 Mouse Healthspan. *Cell Metab* 32, 87-99.e6.  
546 <https://doi.org/10.1016/j.cmet.2020.05.002>
- 547 Gubernatorova, E.O., Gorshkova, E.A., Polinova, A.I., Drutskaya, M.S., 2020. IL-6:  
548 Relevance for immunopathology of SARS-CoV-2. *Cytokine Growth Factor Rev*  
549 53, 13–24. <https://doi.org/10.1016/j.cytogfr.2020.05.009>
- 550 Hanlon, P., Nicholl, B.I., Jani, B.D., Lee, D., McQueenie, R., Mair, F.S., 2018. Frailty  
551 and pre-frailty in middle-aged and older adults and its association with  
552 multimorbidity and mortality: a prospective analysis of 493 737 UK Biobank  
553 participants. *Lancet Public Health* 3, e323–e332. [https://doi.org/10.1016/S2468-](https://doi.org/10.1016/S2468-2667(18)30091-4)  
554 [2667\(18\)30091-4](https://doi.org/10.1016/S2468-2667(18)30091-4)
- 555 Hofstee, M.I., Cevirgel, A., de Zeeuw-Brouwer, M.-L., de Rond, L., van der Klis, F.,  
556 Buisman, A.-M., 2023. Cytomegalovirus and Epstein–Barr virus co-infected young

- 557 and middle-aged adults can have an aging-related T-cell phenotype. *Sci Rep* 13,  
558 10912. <https://doi.org/10.1038/s41598-023-37502-5>
- 559 Joubert, B.R., Felix, J.F., Yousefi, P., Bakulski, K.M., Just, A.C., Breton, C., Reese, S.E.,  
560 Markunas, C.A., Richmond, R.C., Xu, C.-J., Küpers, L.K., Oh, S.S., Hoyo, C.,  
561 Gruzieva, O., Söderhäll, C., Salas, L.A., Baiz, N., Zhang, H., Lepeule, J., Ruiz, C.,  
562 Ligthart, S., Wang, T., Taylor, J.A., Duijts, L., Sharp, G.C., Jankipersadsing, S.A.,  
563 Nilsen, R.M., Vaez, A., Fallin, M.D., Hu, D., Litonjua, A.A., Fuemmeler, B.F.,  
564 Huen, K., Kere, J., Kull, I., Munthe-Kaas, M.C., Gehring, U., Bustamante, M.,  
565 Saurel-Coubizolles, M.J., Quraishi, B.M., Ren, J., Tost, J., Gonzalez, J.R., Peters,  
566 M.J., Håberg, S.E., Xu, Z., van Meurs, J.B., Gaunt, T.R., Kerkhof, M., Corpeleijn,  
567 E., Feinberg, A.P., Eng, C., Baccarelli, A.A., Benjamin Neelon, S.E., Bradman, A.,  
568 Merid, S.K., Bergström, A., Herceg, Z., Hernandez-Vargas, H., Brunekreef, B.,  
569 Pinart, M., Heude, B., Ewart, S., Yao, J., Lemonnier, N., Franco, O.H., Wu, M.C.,  
570 Hofman, A., McArdle, W., Van der Vlies, P., Falahi, F., Gillman, M.W., Barcellos,  
571 L.F., Kumar, A., Wickman, M., Guerra, S., Charles, M.-A., Holloway, J., Auffray,  
572 C., Tiemeier, H.W., Smith, G.D., Postma, D., Hivert, M.-F., Eskenazi, B., Vrijheid,  
573 M., Arshad, H., Antó, J.M., Dehghan, A., Karmaus, W., Annesi-Maesano, I.,  
574 Sunyer, J., Ghantous, A., Pershagen, G., Holland, N., Murphy, S.K., DeMeo, D.L.,  
575 Burchard, E.G., Ladd-Acosta, C., Snieder, H., Nystad, W., Koppelman, G.H.,  
576 Relton, C.L., Jaddoe, V.W.V., Wilcox, A., Melén, E., London, S.J., 2016. DNA  
577 Methylation in Newborns and Maternal Smoking in Pregnancy: Genome-wide  
578 Consortium Meta-analysis. *The American Journal of Human Genetics* 98, 680–  
579 696. <https://doi.org/10.1016/j.ajhg.2016.02.019>
- 580 Kennedy, B.K., Berger, S.L., Brunet, A., Campisi, J., Cuervo, A.M., Epel, E.S.,  
581 Franceschi, C., Lithgow, G.J., Morimoto, R.I., Pessin, J.E., Rando, T.A.,  
582 Richardson, A., Schadt, E.E., Wyss-Coray, T., Sierra, F., 2014. Geroscience:  
583 Linking Aging to Chronic Disease. *Cell* 159, 709–713.  
584 <https://doi.org/10.1016/j.cell.2014.10.039>
- 585 Lima-Silva, M.L., Torres, K.C.L., Mambrini, J.V. de M., Brot, N.C., Santos, S.O.,  
586 Martins-Filho, O.A., Teixeira-Carvalho, A., Lima-Costa, M.F., Peixoto, S.V., 2024.  
587 A nationwide study on immunosenescence biomarkers profile in older adults:

- 588 ELSI-Brazil. *Exp Gerontol* 191, 112433.  
589 <https://doi.org/10.1016/j.exger.2024.112433>
- 590 Ling, C., Rönn, T., 2019. Epigenetics in Human Obesity and Type 2 Diabetes. *Cell*  
591 *Metab* 29, 1028–1044. <https://doi.org/10.1016/j.cmet.2019.03.009>
- 592 Mazzone, R., Zwergel, C., Artico, M., Taurone, S., Ralli, M., Greco, A., Mai, A., 2019.  
593 The emerging role of epigenetics in human autoimmune disorders. *Clin*  
594 *Epigenetics* 11, 34. <https://doi.org/10.1186/s13148-019-0632-2>
- 595 Mills, K.H.G., 2023. IL-17 and IL-17-producing cells in protection versus pathology.  
596 *Nat Rev Immunol* 23, 38–54. <https://doi.org/10.1038/s41577-022-00746-9>
- 597 Pajulas, A., Zhang, J., Kaplan, M.H., 2023. The World according to IL-9. *The Journal of*  
598 *Immunology* 211, 7–14. <https://doi.org/10.4049/jimmunol.2300094>
- 599 Pauwels, S., Ghosh, M., Duca, R.C., Bekaert, B., Freson, K., Huybrechts, I., Langie,  
600 S.A.S., Koppen, G., Devlieger, R., Godderis, L., 2017. Maternal intake of methyl-  
601 group donors affects DNA methylation of metabolic genes in infants. *Clin*  
602 *Epigenetics* 9, 16. <https://doi.org/10.1186/s13148-017-0321-y>
- 603 Pawelec, G., 2014. Immunosenescence: Role of cytomegalovirus. *Exp Gerontol* 54,  
604 1–5. <https://doi.org/10.1016/j.exger.2013.11.010>
- 605 Pellegrini, C., Pirazzini, C., Sala, C., Sambati, L., Yusipov, I., Kalyakulina, A., Ravaioli,  
606 F., Kwiatkowska, K.M., Durso, D.F., Ivanchenko, M., Monti, D., Lodi, R.,  
607 Franceschi, C., Cortelli, P., Garagnani, P., Bacalini, M.G., 2021. A Meta-Analysis  
608 of Brain DNA Methylation Across Sex, Age, and Alzheimer’s Disease Points for  
609 Accelerated Epigenetic Aging in Neurodegeneration. *Front Aging Neurosci* 13.  
610 <https://doi.org/10.3389/fnagi.2021.639428>
- 611 Plusquin, M., Guida, F., Polidoro, S., Vermeulen, R., Raaschou-Nielsen, O.,  
612 Campanella, G., Hoek, G., Kyrtopoulos, S.A., Georgiadis, P., Naccarati, A.,  
613 Sacerdote, C., Krogh, V., Bas Bueno-de-Mesquita, H., Monique Verschuren, W.M.,  
614 Sayols-Baixeras, S., Panni, T., Peters, A., Hebels, D.G.A.J., Kleinjans, J., Vineis,  
615 P., Chadeau-Hyam, M., 2017. DNA methylation and exposure to ambient air  
616 pollution in two prospective cohorts. *Environ Int* 108, 127–136.  
617 <https://doi.org/10.1016/j.envint.2017.08.006>

- 618 Raffington, L., 2024. Utilizing epigenetics to study the shared nature of development  
619 and biological aging across the lifespan. *NPJ Sci Learn* 9, 24.  
620 <https://doi.org/10.1038/s41539-024-00239-5>
- 621 Ramos, G.C., 2012. Inflammation as an Animal Development Phenomenon. *Clin Dev*  
622 *Immunol* 2012, 1–8. <https://doi.org/10.1155/2012/983203>
- 623 Santoro, A., Bientinesi, E., Monti, D., 2021. Immunosenescence and inflammaging in  
624 the aging process: age-related diseases or longevity? *Ageing Res Rev* 71, 101422.  
625 <https://doi.org/10.1016/j.arr.2021.101422>
- 626 Turner, D.C., Gorski, P.P., Maasar, M.F., Seaborne, R.A., Baumert, P., Brown, A.D.,  
627 Kitchen, M.O., Erskine, R.M., Dos-Remedios, I., Voisin, S., Eynon, N., Sultanov,  
628 R.I., Borisov, O. V., Larin, A.K., Semenova, E.A., Popov, D. V., Generozov, E. V.,  
629 Stewart, C.E., Drust, B., Owens, D.J., Ahmetov, I.I., Sharples, A.P., 2020. DNA  
630 methylation across the genome in aged human skeletal muscle tissue and muscle-  
631 derived cells: the role of HOX genes and physical activity. *Sci Rep* 10, 15360.  
632 <https://doi.org/10.1038/s41598-020-72730-z>
- 633 Wang, X., Wong, K., Ouyang, W., Rutz, S., 2019. Targeting IL-10 Family Cytokines for  
634 the Treatment of Human Diseases. *Cold Spring Harb Perspect Biol* 11, a028548.  
635 <https://doi.org/10.1101/cshperspect.a028548>
- 636 Yazdi, A.S., Ghoreschi, K., 2016. The Interleukin-1 Family, in: *Advances in*  
637 *Experimental Medicine and Biology*. Springer New York LLC, pp. 21–29.  
638 [https://doi.org/10.1007/978-94-024-0921-5\\_2](https://doi.org/10.1007/978-94-024-0921-5_2)
- 639
- 640
- 641

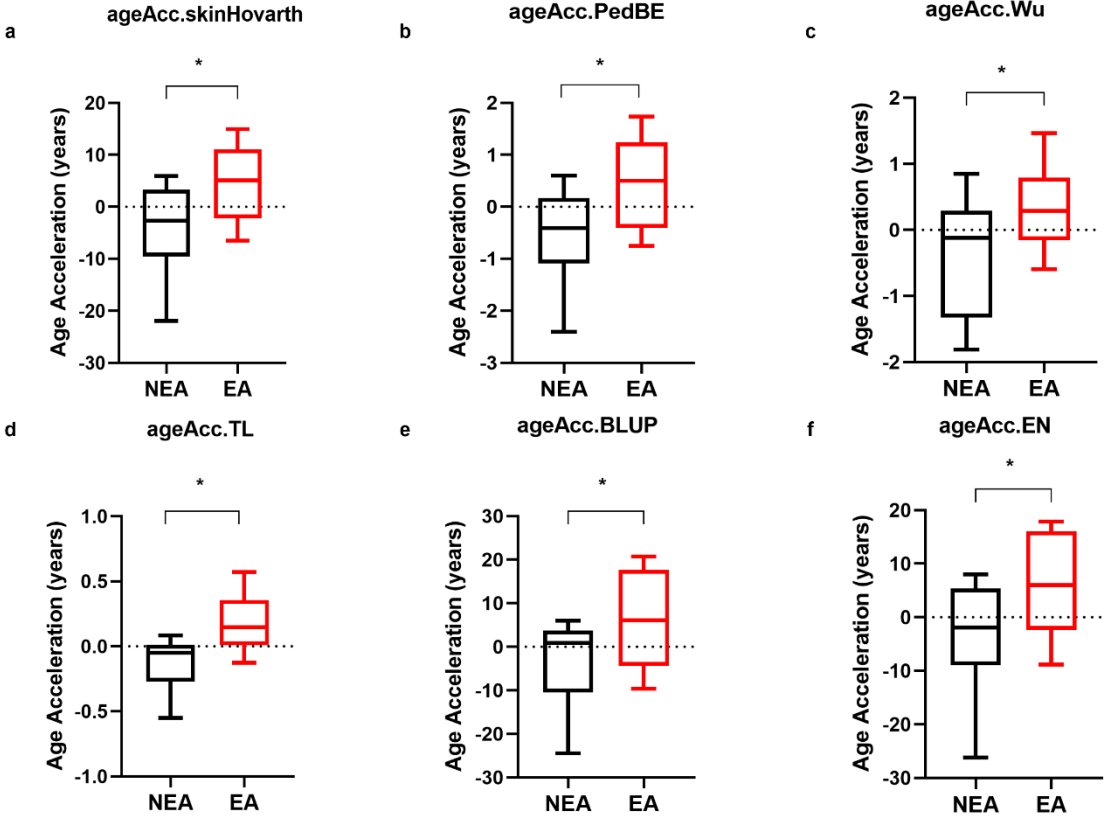



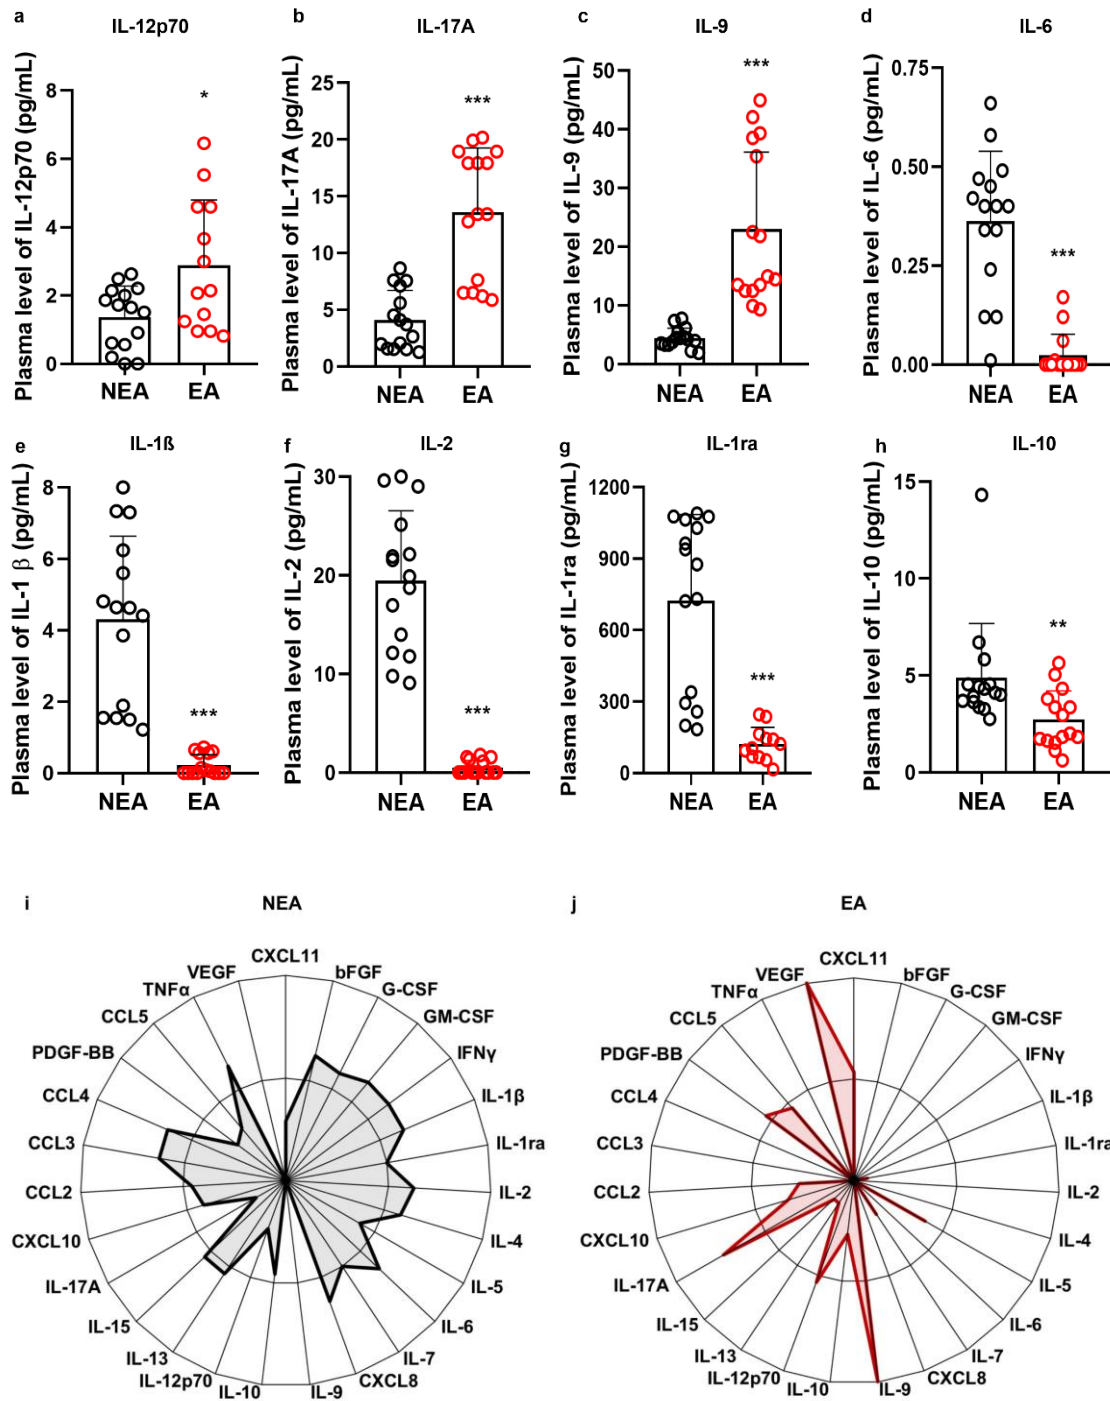



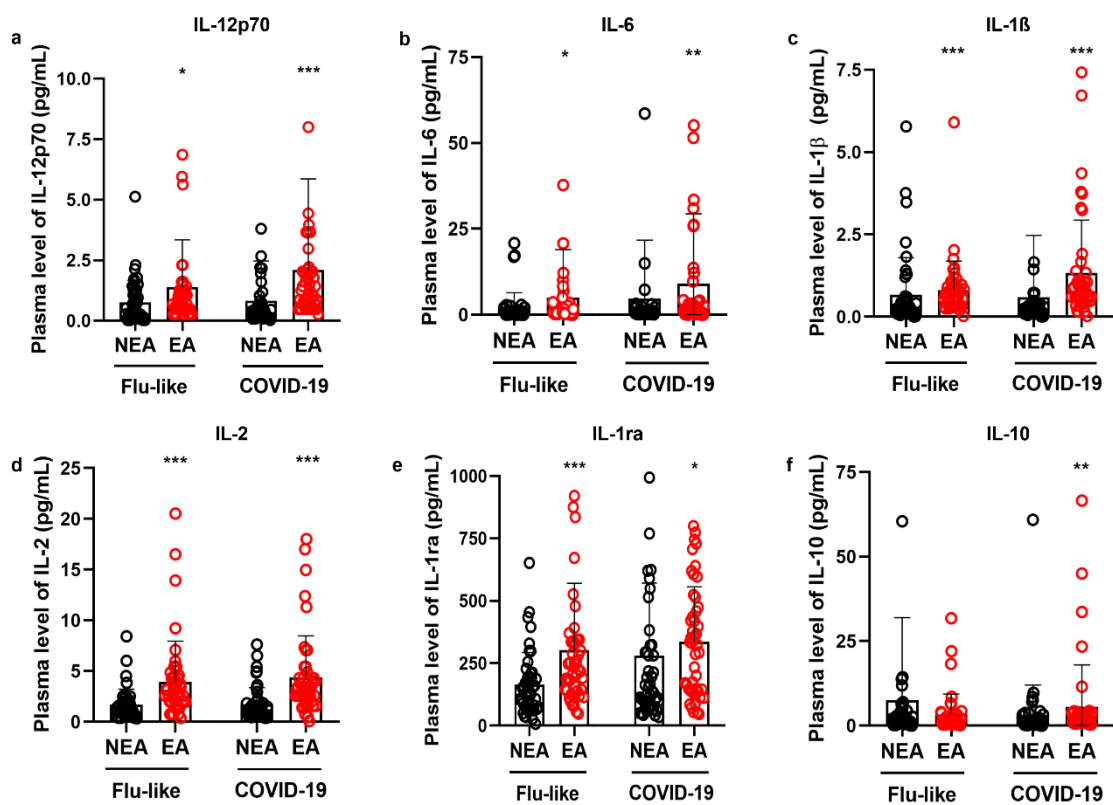

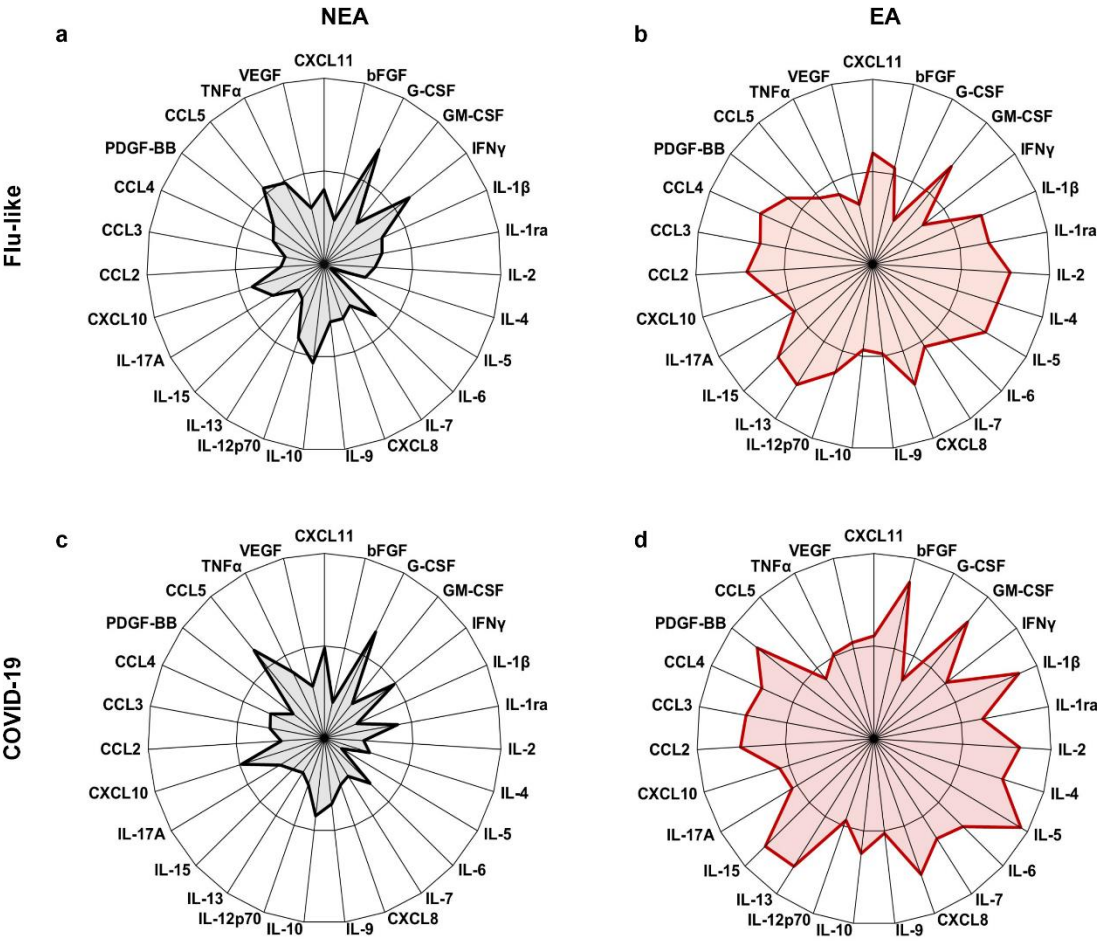

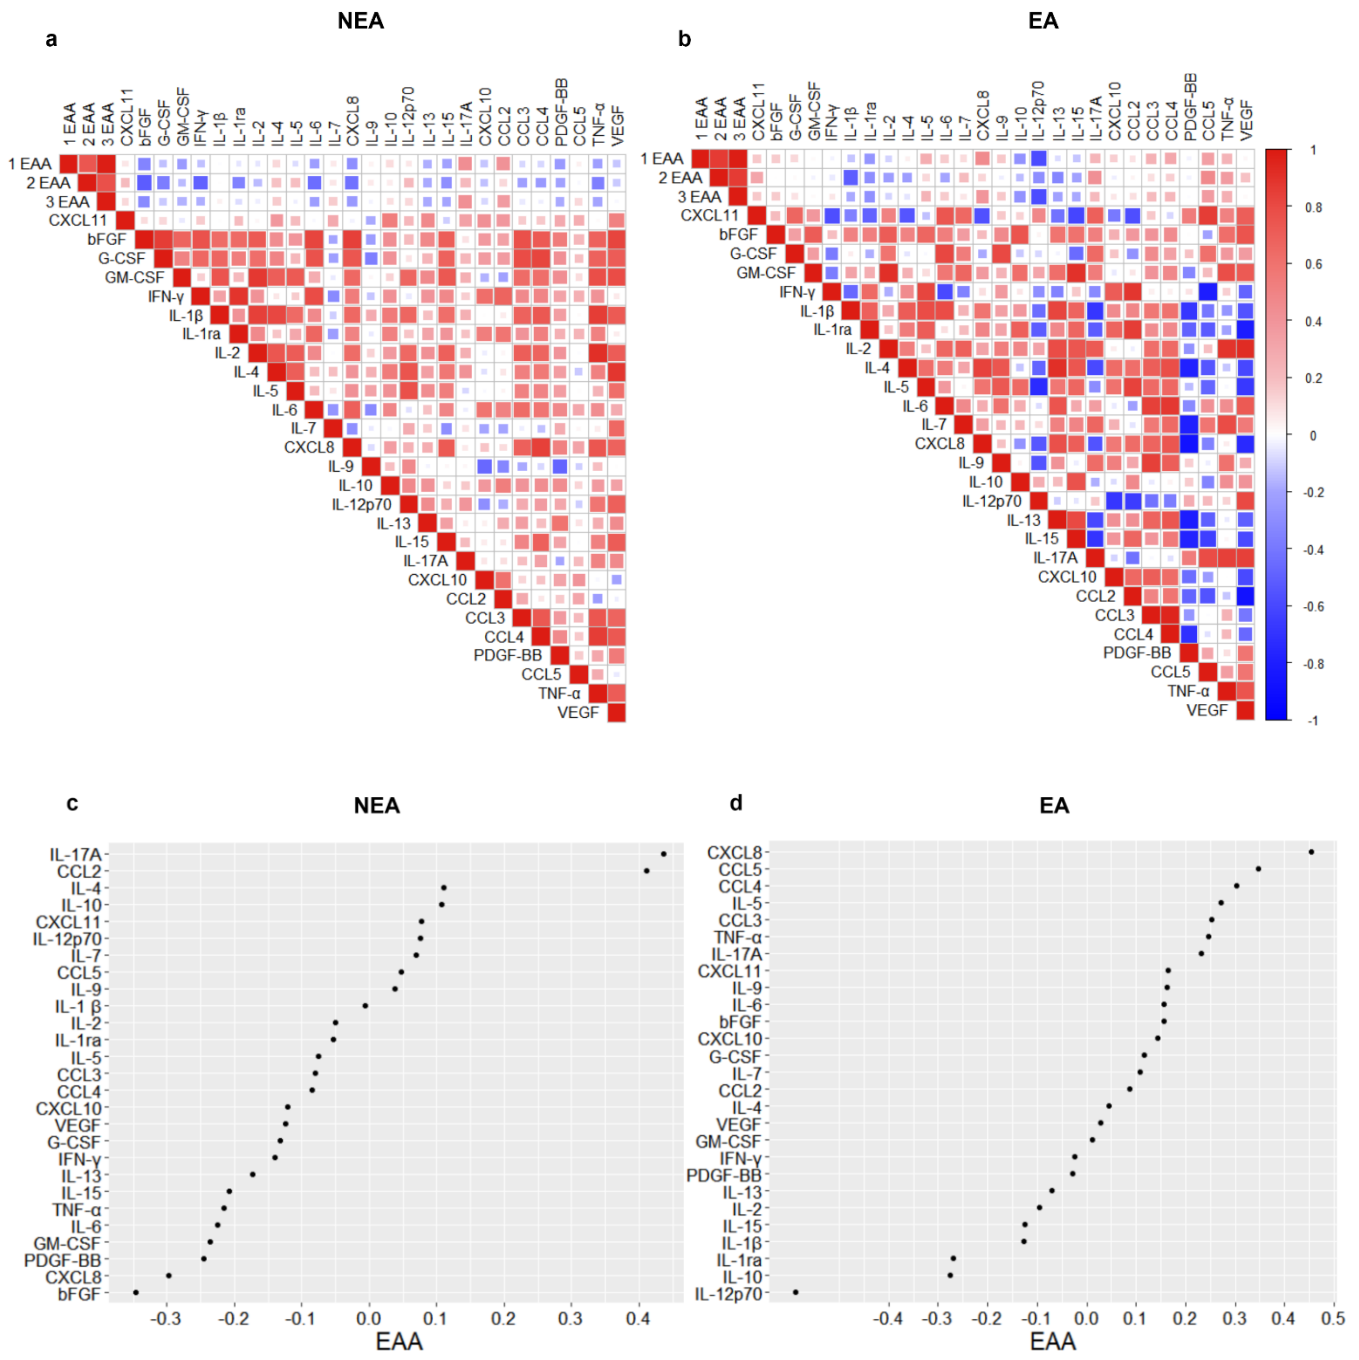

Source: https://medrxiv.org/content/10.1101/2024.12.16.24319110v1.full.pdf
